# Supplementary material for: Electrochemical reduction of O2 in 1-butyl-1-methylpyrrolidinium bis(trifluoromethanesulfonyl)imide ionic liquid containing Zn2+ cations: deposition of non-polar oriented ZnO nanocrystalline films
Source: Royal Society of Chemistry journal article supplement (doi:10.1039/c1cp20718k), 2011-01-01
Supplement: c1cp20718k.pdf [file c1cp20718k.pdf]

# **Electrochemical reduction of O<sub>2</sub> in 1-butyl-1-methylpyrrolidinium bis(trifluoromethane sulfonyl)imide ionic liquid containing Zn<sup>2+</sup> cations: towards the deposition of non-polar oriented ZnO nanocrystalline films**

*Eneko Azaceta<sup>a</sup>, Rebeca Marcilla<sup>a</sup>, David Mecerreyes<sup>a</sup>, Mariana Ungureanu<sup>b</sup>, Apurba Dev<sup>c</sup>, Tobias Voss<sup>c</sup>, Sébastien Fantini<sup>d</sup>, Hans-Jurgen Grande<sup>a</sup>, Germán Cabañero<sup>a</sup>, Ramón Tena-Zaera<sup>a,\*</sup>*

<sup>a</sup>New Materials Department, CIDETEC, Centre for Electrochemical Technologies, Parque Tecnológico de San Sebastián, Paseo Miramón 196, Donostia-San Sebastián 20009, Spain

<sup>b</sup>CIC BIOMAGUNE, Parque Tecnológico de San Sebastián, Paseo Miramón 182 C, Donostia-San Sebastián 20009, Spain

<sup>c</sup>Institute of Solid State Physics, University of Bremen, P.O. Box 330440, 28334 BREMEN, Germany

<sup>d</sup>Solvionic, Chemin de la Loge, Toulouse 31078, France

## **Supplementary Information**

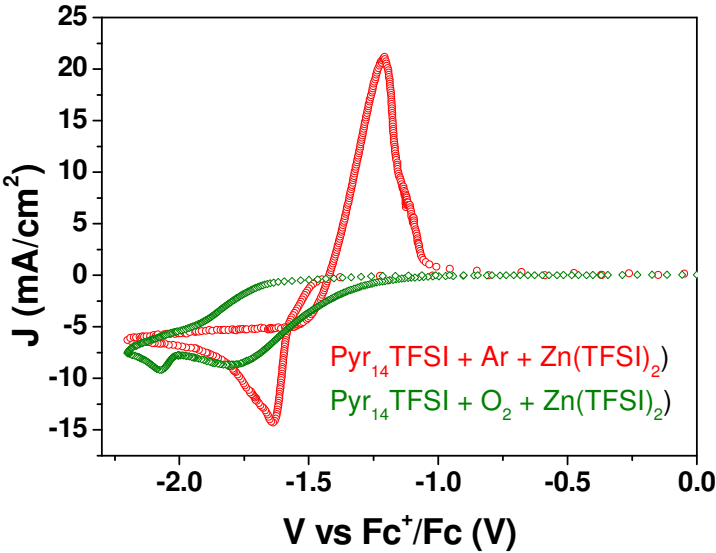

**Figure S1.** Voltammograms of PYR<sub>14</sub>TFSI, Zn(TFSI)<sub>2</sub> bubbled with Ar (○, red) and O<sub>2</sub> (◇, green). In other words, the latter corresponds to the full electrolyte (PYR<sub>14</sub>TFSI, Zn(TFSI)<sub>2</sub> + O<sub>2</sub>) used for the ZnO electrodepositions. The concentration of Zn(TFSI)<sub>2</sub> is 5x10<sup>-2</sup> M in both cases.

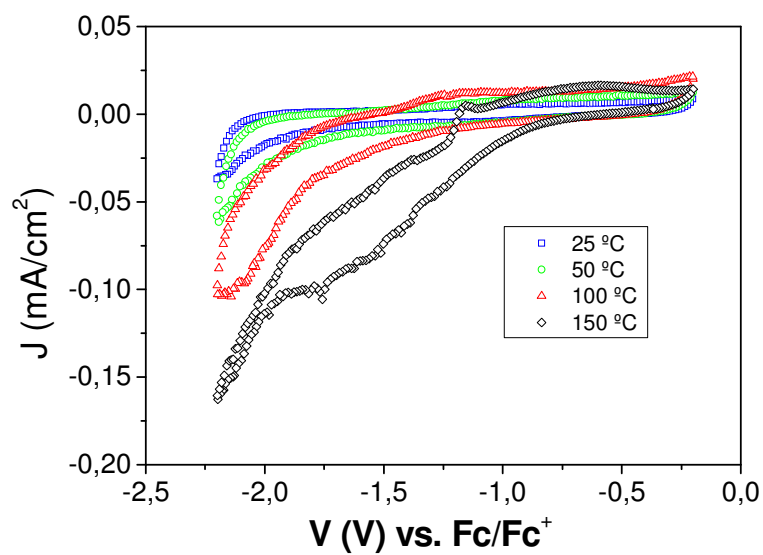

**Figure S2.** Cyclic voltametries of Argon purged Pyr<sub>14</sub>TFSI at 25 °C (□, blue), 50 °C (○, green), 100 °C (Δ, red) and 150 °C (◇, black).

**Table S1.** Atomic concentration of each element obtained from the depth profiling XPS analysis for samples electrodeposited at different temperatures: 75, 100 and 150 °C.

|                     |       | Energy (eV) | No Ar etching | Ar etching |       |        |        |        |        |
|---------------------|-------|-------------|---------------|------------|-------|--------|--------|--------|--------|
|                     |       |             |               | 1 min      | 5 min | 10 min | 15 min | 20 min | 30 min |
| Deposited at 75 °C  | C 1s  | 285.0       | 26.6%         | 13.5%      | 10.0% | 9.0%   | 7.2%   | 9%     | 7%     |
|                     | Zn 1s | 1022.5      | 27.8%         | 43.4%      | 48.0% | 50.0%  | 50.5%  | 49.3%  | 52.0%  |
|                     | O 1s  | 530.8       | 29.6%         | 31.2%      | 31.5% | 31.0%  | 32.0%  | 31.0%  | 31.2%  |
|                     |       | 532.5       | 15.0%         | 10.4%      | 9.5%  | 9.5%   | 9.3%   | 9.5%   | 9.0%   |
|                     | F 1s  | 685.2       | 0%            | 0.7%       | 0.5%  | 0.3%   | 0.5%   | 0.6%   | 0.3%   |
|                     |       | 688.7       | 0%            | 0%         | 0%    | 0%     | 0%     | 0%     | 0%     |
| Deposited at 100 °C | C 1s  | 285.0       | 19.0%         | 8.5%       | 10.0% | 8.5%   | 9.0%   | 8.0%   | 7.0%   |
|                     | Zn 1s | 1022.5      | 34.0%         | 47.0%      | 48.0% | 49.0%  | 49.0%  | 49.5%  | 50.0%  |
|                     | O 1s  | 530.8       | 25.5%         | 32.5%      | 30.0% | 30.5%  | 30.0%  | 30.5%  | 31.0%  |
|                     |       | 532.5       | 18.0%         | 10.0%      | 10.5% | 10.0%  | 10.0%  | 10.0%  | 10.0%  |
|                     | F 1s  | 685.2       | 0%            | 2.0%       | 1.5%  | 2.0%   | 2.0%   | 2.0%   | 2.0%   |
|                     |       | 688.7       | 0%            | 0%         | 0%    | 0%     | 0%     | 0%     | 0%     |
| Deposited at 150 °C | C 1s  | 285.0       | 9.6%          | 6.7%       | 5.7%  | 5.0%   | 3.8%   | 3.1%   | 3.6%   |
|                     | Zn 1s | 1022.5      | 32.4%         | 39.0%      | 43.5% | 45.2%  | 44.2%  | 45.3%  | 45.4%  |
|                     | O 1s  | 530.8       | 25.2%         | 29.6%      | 30.5% | 33.0%  | 33.0%  | 33.2%  | 33.5%  |
|                     |       | 532.5       | 16.2%         | 13.0%      | 11.5% | 10.7%  | 10.2%  | 10.4%  | 10.2%  |
|                     | F 1s  | 685.2       | 0%            | 1.7%       | 0.8%  | 1.1%   | 1.1%   | 1.6%   | 0.8%   |
|                     |       | 688.7       | 0%            | 0%         | 0%    | 0%     | 0%     | 0%     | 0%     |

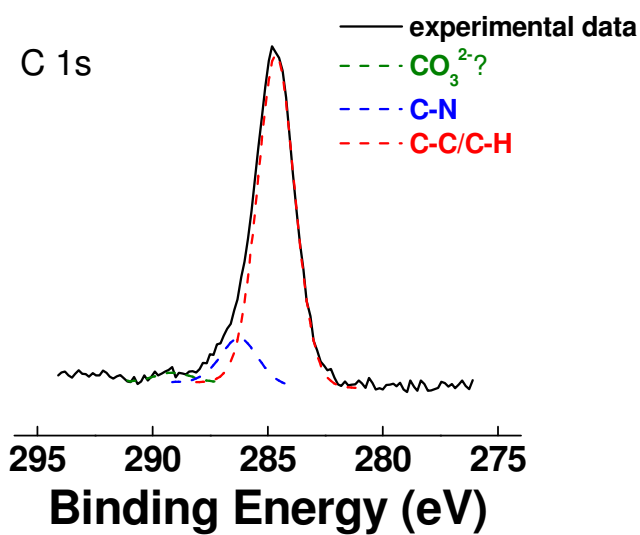

**Figure S3.** Deconvolution of the C1s XPS spectra feature from films electrodeposited at 150 °C.

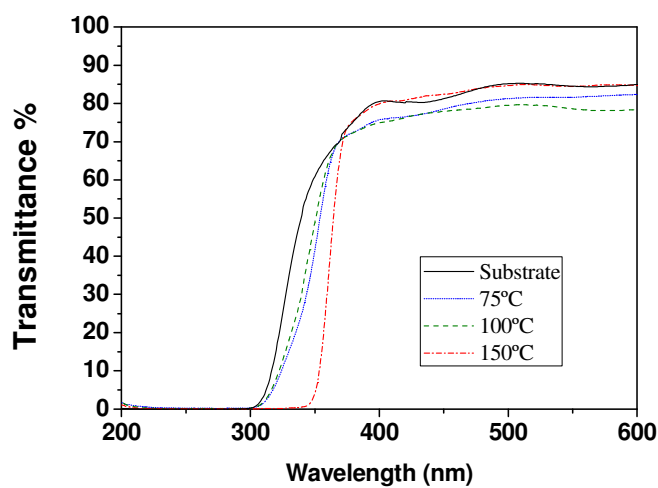

**Figure S4.** Optical transmittance spectra of the naked substrate and three samples electrodeposited at different temperature.
